# Supplementary material for: Metal–organic framework-engaged formation of a hierarchical hybrid with carbon nanotube inserted porous carbon polyhedra for highly efficient capacitive deionization
Source: Royal Society of Chemistry journal article supplement (doi:10.1039/c6ta00618c), 2016-01-01
Supplement: c6ta00618c1.pdf [file c6ta00618c1.pdf]

**Metal-organic frameworks-engaged formation of  
hierarchical hybrid with carbon nanotubes inserted porous  
carbon polyhedra for highly efficient capacitive deionization**

Xingtao Xu,<sup>‡</sup> Miao Wang,<sup>‡</sup> Yong Liu, Ting Lu and Likun Pan\*

*Engineering Research Center for Nanophotonics & Advanced Instrument, Ministry of  
Education, Shanghai Key Laboratory of Magnetic Resonance, Department of Physics,  
East China Normal University, Shanghai 200062, China*

---

\* Corresponding author. Fax: +86 21 62234321; Tel: +86 21 62234132; E-mail: [lkpan@phy.ecnu.edu.cn](mailto:lkpan@phy.ecnu.edu.cn)

<sup>‡</sup> These two authors contributed equally to this work.

## Results and discussion

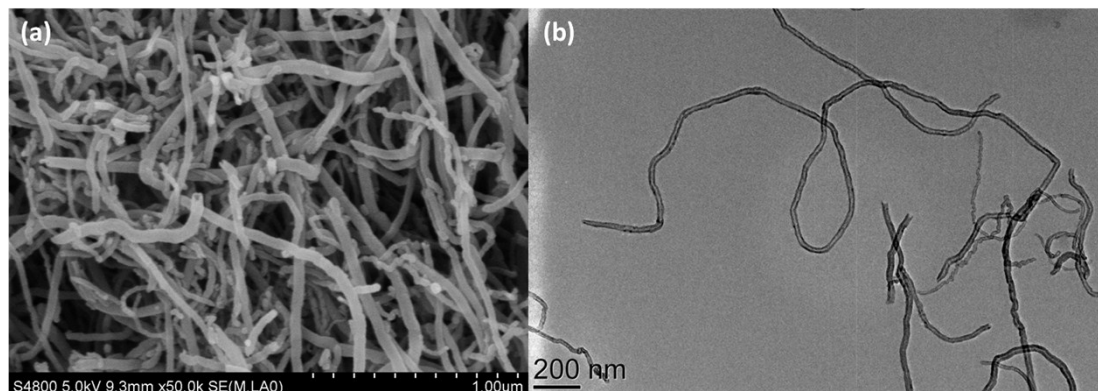

Fig. S1 SEM (a) and TEM (b) images of CNTs.

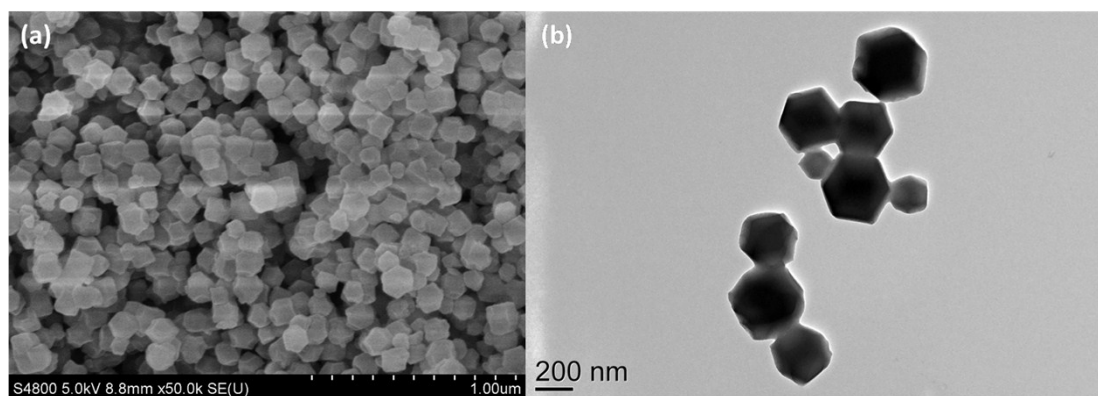

Fig. S2 SEM (a) and TEM (b) images of PCP.

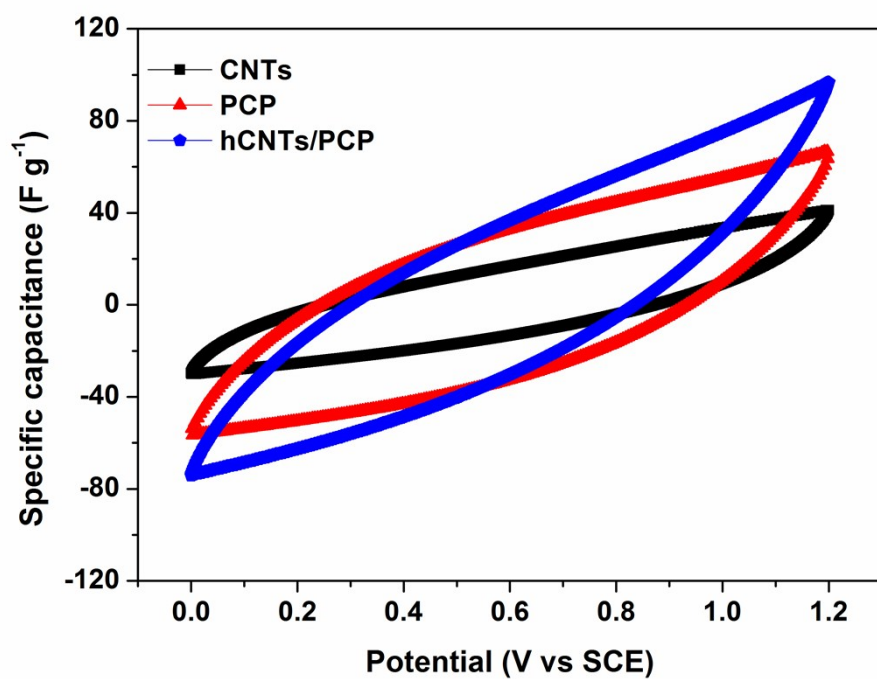

Fig. S3 CV curves of CNTs, PCP and hCNTs/PCP in 17 mM (~1000 mg L<sup>-1</sup>) NaCl solution at a

scan rate of 5 mV s<sup>-1</sup>.

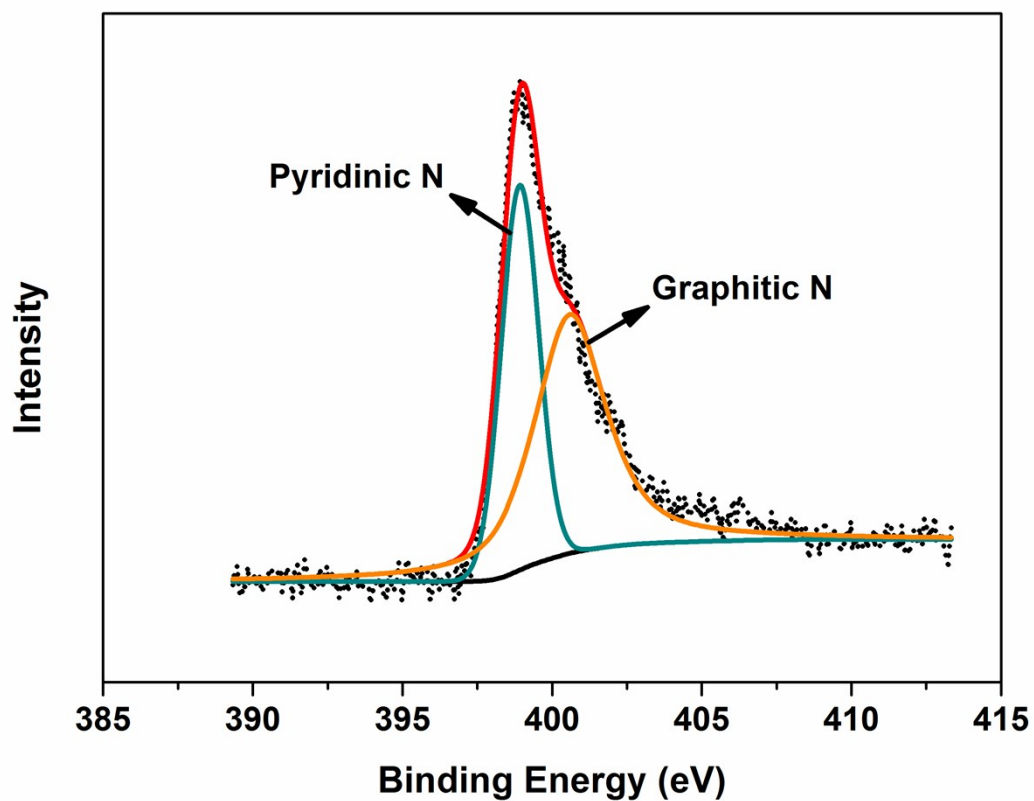

Fig. S4 High-resolution N1s XPS spectrum of hCNTs/PCP.

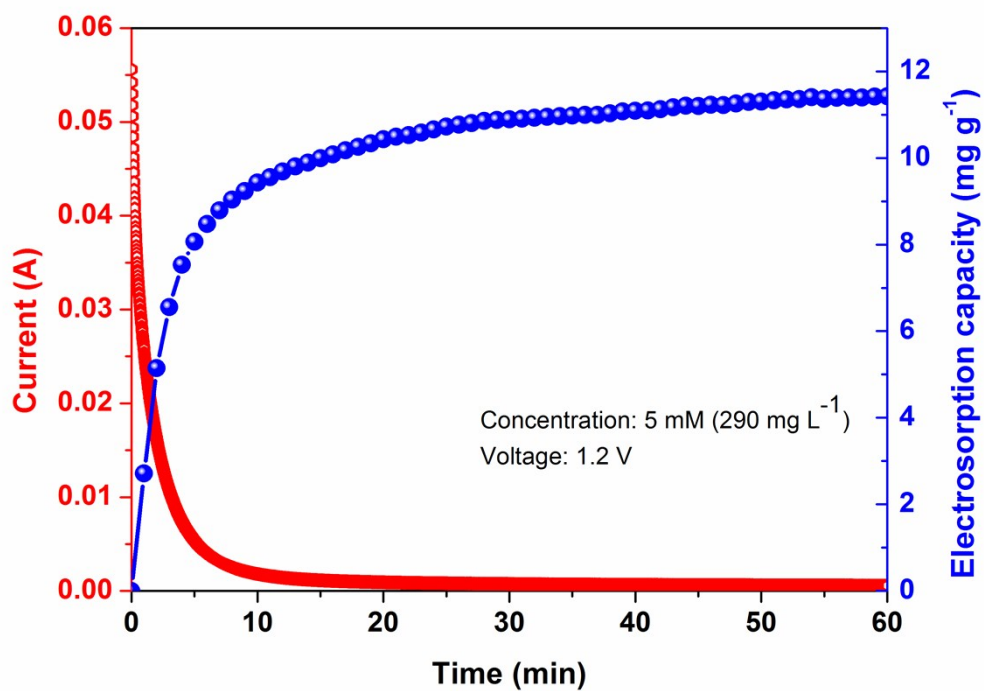

Fig. S5 Current and electrodesorption capacity of hCNTs/PCP electrode vs time in NaCl solution

with an initial concentration of 290 mg L<sup>-1</sup> at 1.2 V.

Table S1 Thickness of CNTs, PCP and hCNTs/PCP-based CDI positive and negative electrodes.

| Sample                         | CNTs      |           | PCP       |           | hCNTs/PCP |           |
|--------------------------------|-----------|-----------|-----------|-----------|-----------|-----------|
|                                | positive  | negative  | positive  | negative  | positive  | negative  |
|                                | electrode | electrode | electrode | electrode | electrode | electrode |
| Thickness<br>( $\mu\text{m}$ ) | 215       | 213       | 190       | 193       | 207       | 205       |
